# Supplementary material
Source: Research Square preprint supplement (doi:10.21203/rs.3.rs-9185242/v1)

**GRAPHICAL ABSTRACT**


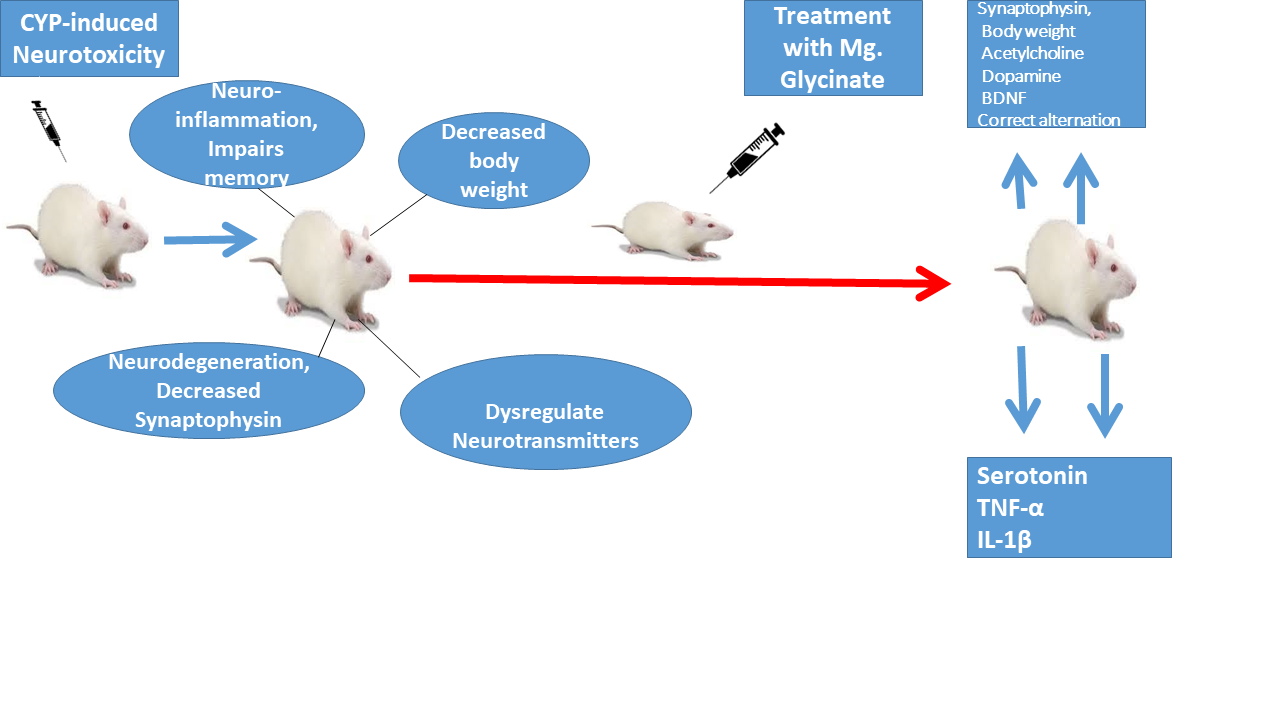

Supplement: Supplementary file 1 [file 655c074625bfa4e8852812aa.docx]
